# Supplementary material for: Remodeling “cold” tumor immune microenvironment via epigenetic-based therapy using targeted liposomes with in situ formed albumin corona
Source: PubMed Central journal article supplement — Acta Pharm Sin B. 2021 Sep 30;12(4):2057–73. doi: 10.1016/j.apsb.2021.09.022 (PMC9279642; doi:10.1016/j.apsb.2021.09.022), 2021-09-30

## Supporting Information for

### Original Article

# Remodeling “cold” tumor immune microenvironment *via* epigenetic-based therapy using targeted liposomes with *in situ* formed albumin corona

Yang He<sup>a,b,c,d,†</sup>, Yuefei Fang<sup>a,e,†</sup>, Meng Zhang<sup>a,f</sup>, Yuge Zhao<sup>a</sup>, Bin Tu<sup>a,b</sup>, Mingjie Shi<sup>a</sup>, Bahtiyor Muhitdinov<sup>a,g</sup>, Akmal Asrorov<sup>a,g</sup>, Qin Xu<sup>e</sup>, Yongzhuo Huang<sup>a,b,c,h,\*</sup>

<sup>a</sup>State Key Laboratory of Drug Research, Shanghai Institute of Materia Medica, Chinese Academy of Sciences, Shanghai 201203, China

<sup>b</sup>University of Chinese Academy of Sciences, Beijing 100049, China

<sup>c</sup>Zhongshan Institute for Drug Discovery, Shanghai Institute of Materia Medica, Chinese Academy of Sciences, Zhongshan 528437, China

<sup>d</sup>Department of Pharmacy, the First Affiliated Hospital of Zhengzhou University, Zhengzhou 450052, China

<sup>e</sup>Artemisinin Research Center, Guangzhou University of Chinese Medicine, Guangzhou 510450, China

<sup>f</sup>Women's Hospital, School of Medicine, Zhejiang University, Hangzhou 310006, China

<sup>g</sup>Institute of Bioorganic Chemistry, Uzbekistan Academy of Sciences, Tashkent 100125, Uzbekistan

<sup>h</sup>National Medical Products Administration, Key Laboratory for Quality Research and Evaluation of Pharmaceutical Excipients, Shanghai 201203, China

Received 27 July 2021; received in revised form 21 September 2021; accepted 22 September 2021

\*Corresponding author. Tel./fax: +86 2120231981.

E-mail address: [yzhuang@simmm.ac.cn](mailto:yzhuang@simmm.ac.cn) (Yongzhuo Huang).

<sup>†</sup>These authors made equal contributions to this work.

**Table S1** The HPLC condition of Pano: gradient elution method.

| Time (min) | Flow rate (mL/min) | Acetonitrile | 0.1% Phosphoric acid | Wavelength (nm) |
|------------|--------------------|--------------|----------------------|-----------------|
| 0          |                    | 5%           | 95%                  |                 |
| 2          |                    | 5%           | 95%                  |                 |
| 12         | 1                  | 65%          | 35%                  | 280             |
| 14         |                    | 5%           | 95%                  |                 |
| 15         |                    | 5%           | 95%                  |                 |

**Table S2** The HPLC condition of JQ1: isocratic elution method.

| Flow rate (mL/min) | H <sub>2</sub> O | Acetonitrile | Wavelength (nm) |
|--------------------|------------------|--------------|-----------------|
| 1                  | 40%              | 60%          | 254             |

**Table S3** The combination index of various ratios of Pano and JQ1 in CT26 tumor cells.

| Pano/JQ1 (molar ratio) | Combination index |
|------------------------|-------------------|
| 4:1                    | 0.64              |
| 2:1                    | 0.40              |
| 1:1                    | 0.38              |
| 1:2                    | 0.25              |
| 1:4                    | 0.31              |

**Figure S1** Characterization of the materials. A) Schematic diagram of the synthesis of DSPE-PEG-LF. B) MALDI-TOF of lactoferrin (left), DSPE-PEG-NHS (middle), and DSPE-PEG-LF (right). C) Characteristic  $^1\text{H}$ -NMR spectra of lactoferrin (top), DSPE-PEG-NHS (middle), and DSPE-PEG-LF (bottom). D) Characteristic  $^{13}\text{C}$ -NMR spectra of lactoferrin (top), DSPE-PEG-NHS (middle), and DSPE-PEG-LF (bottom).

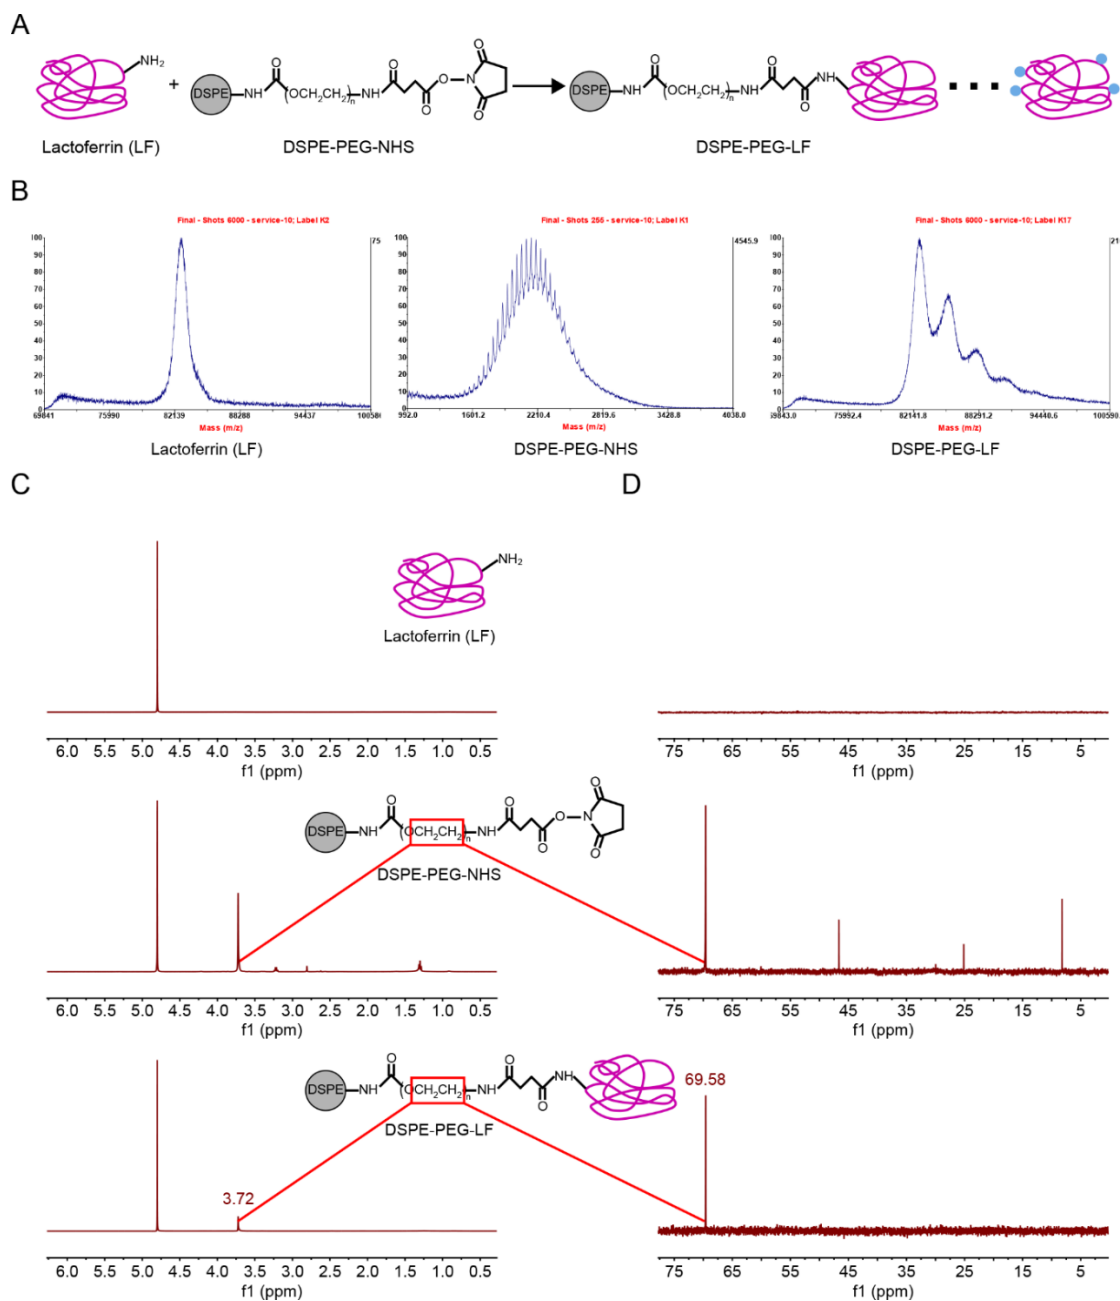

**Figure S2** Glycolysis regulation in macrophages after treatment with Pano and JQ1.

A) The reduced lactic acid production in M2 $\Phi$  after treatment. B) Expression of PKM2 in M2 $\Phi$  after treatment. Data are presented as mean $\pm$ SD ( $n=3$ ). \*\* $P<0.01$ , \*\*\*\* $P<0.0001$ .

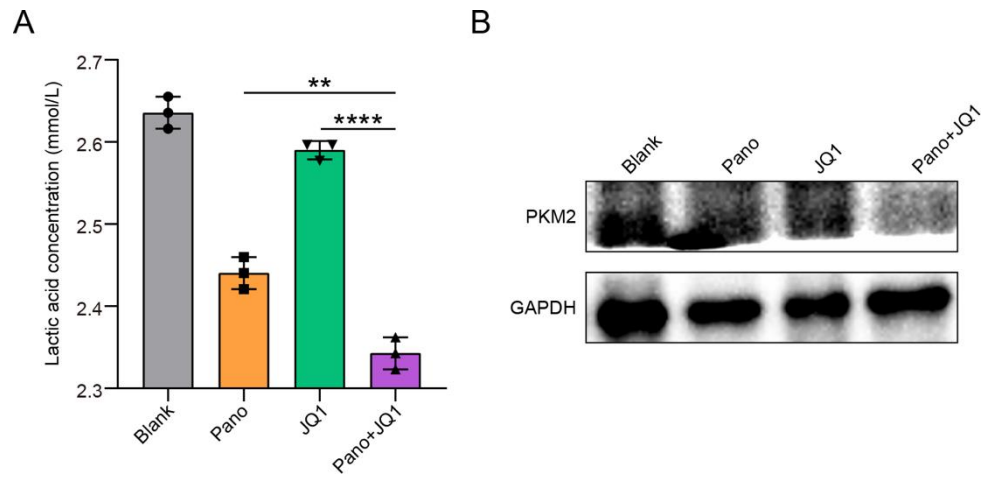

**Figure S3** Cellular uptake and *in vitro* cytotoxicity of the liposomes in BMDMs. A) Cellular uptake of Lipo and LF-Lipo in M2 $\Phi$  cells. B) Statistical analysis of cellular uptake efficiency in M2 $\Phi$  cells. C) Cytotoxicity test in BMDMs after treatment. Data are presented as mean  $\pm$ SD ( $n=3$ ). \*\*\*\* $P<0.0001$ .

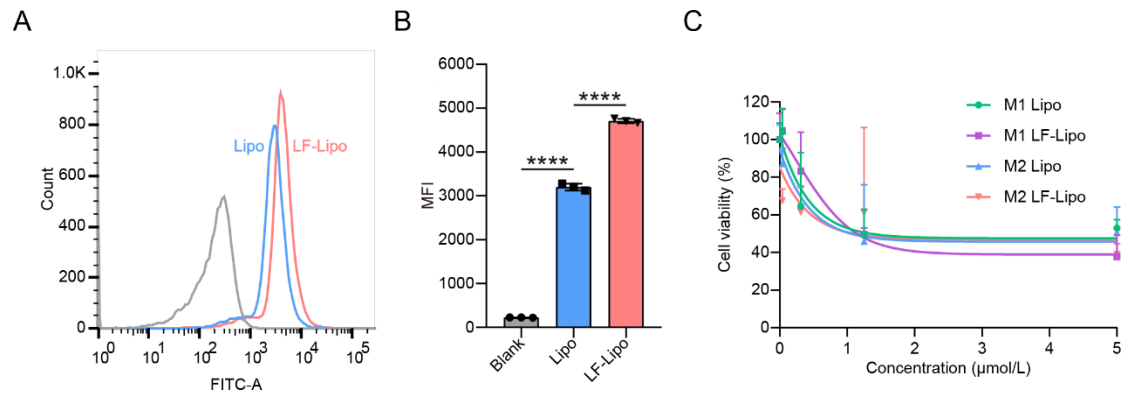

**Figure S4** Preliminary safety evaluation in CT26 subcutaneous tumor-bearing mouse model. A) The body weight changes during the treatment. B) The organ coefficients. C) Histological examination of the major organs (scale bar=100  $\mu$ m). No obvious lesion was found in all groups. Data are presented as mean  $\pm$ SD ( $n=6$ ).

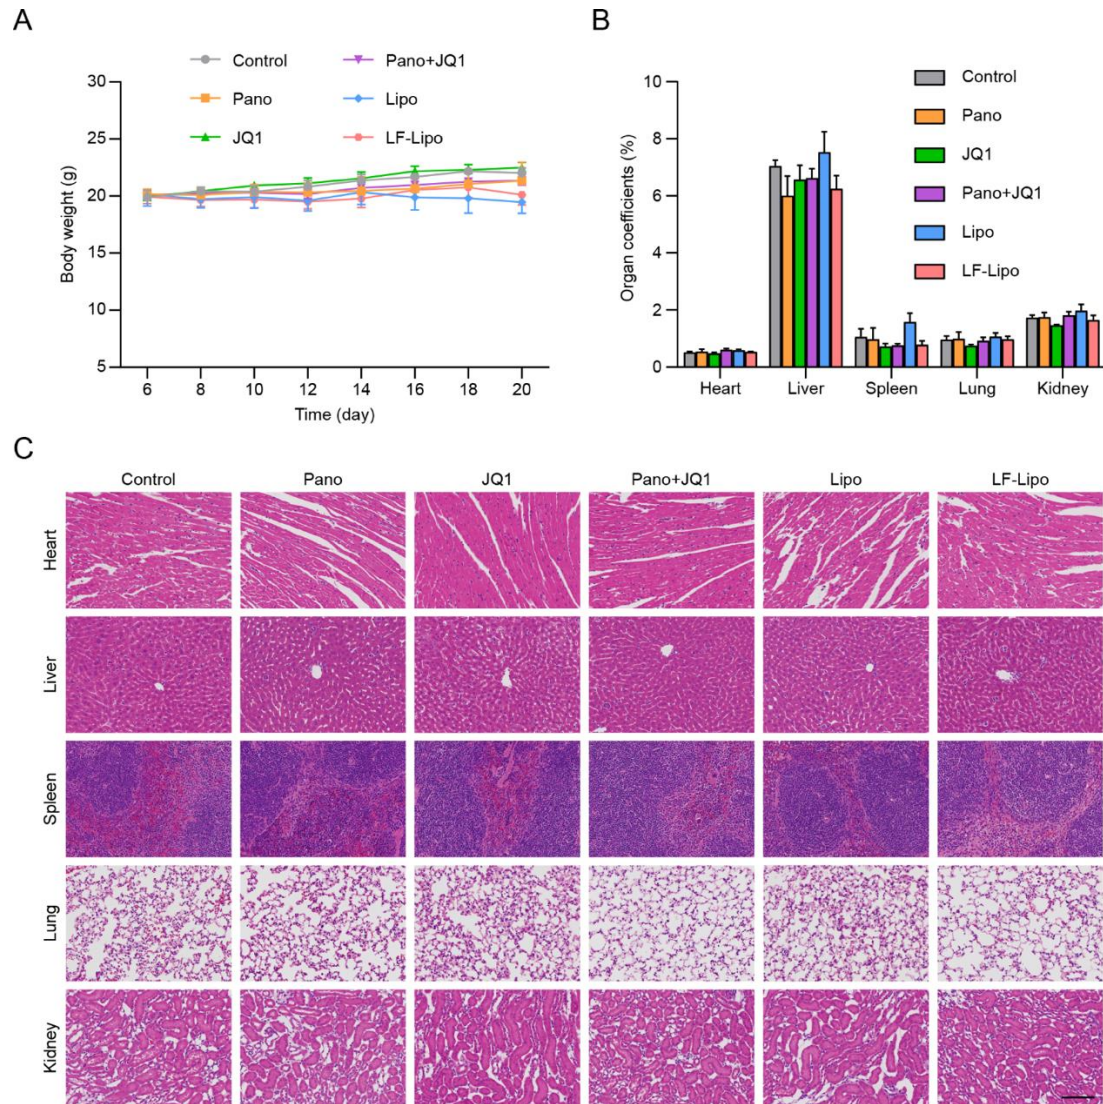

**Figure S5** Immune cell assay in the CT26 subcutaneous tumor. The percentage of CD45<sup>+</sup> Gr-1<sup>+</sup> (A), F4/80<sup>+</sup> CD206<sup>+</sup> (B), CD49b<sup>+</sup> NK1.1<sup>+</sup> (C), CD8<sup>+</sup> granzyme B<sup>+</sup> (D) cells in the tumor tissues.

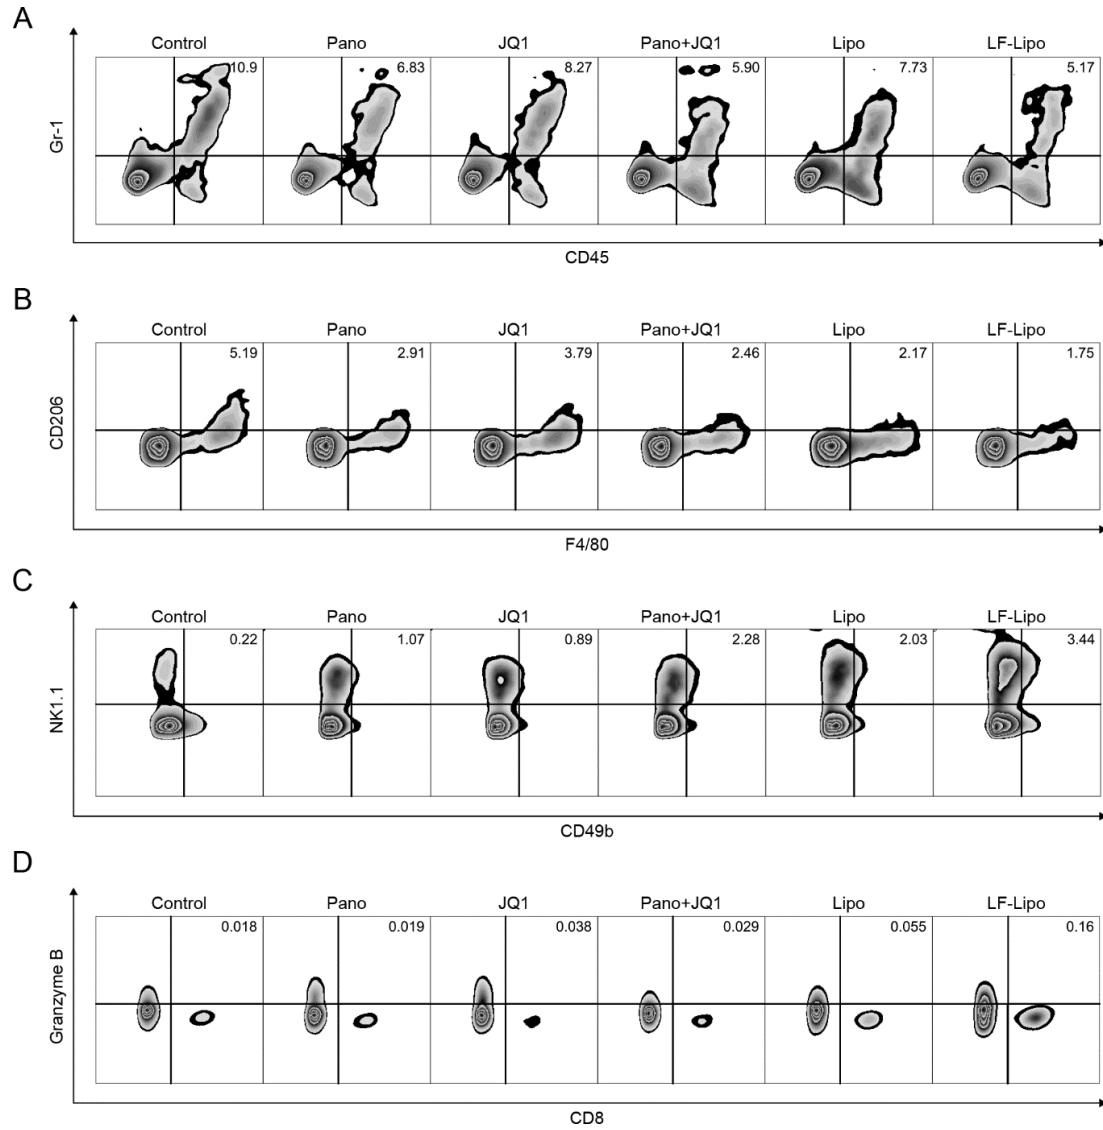

**Figure S6** *In vivo* imaging and biodistribution of the liposomes in CT26 peritoneal tumor model. A) Schematic diagram of the detection of the CT26 peritoneal tumor. B) Bioluminescence imaging of CT26 peritoneal tumor. C) *In vivo* imaging from 0.5 h to 24 h. D) *In vivo* real-time radiant efficiency at the tumor sites. E) *Ex vivo* imaging of major organs and CT26 peritoneal tumors. F) *Ex vivo* radiant efficiency of the CT26 peritoneal tumors. Data are presented as mean  $\pm$ SD ( $n=3$ ). \*  $P<0.05$ .

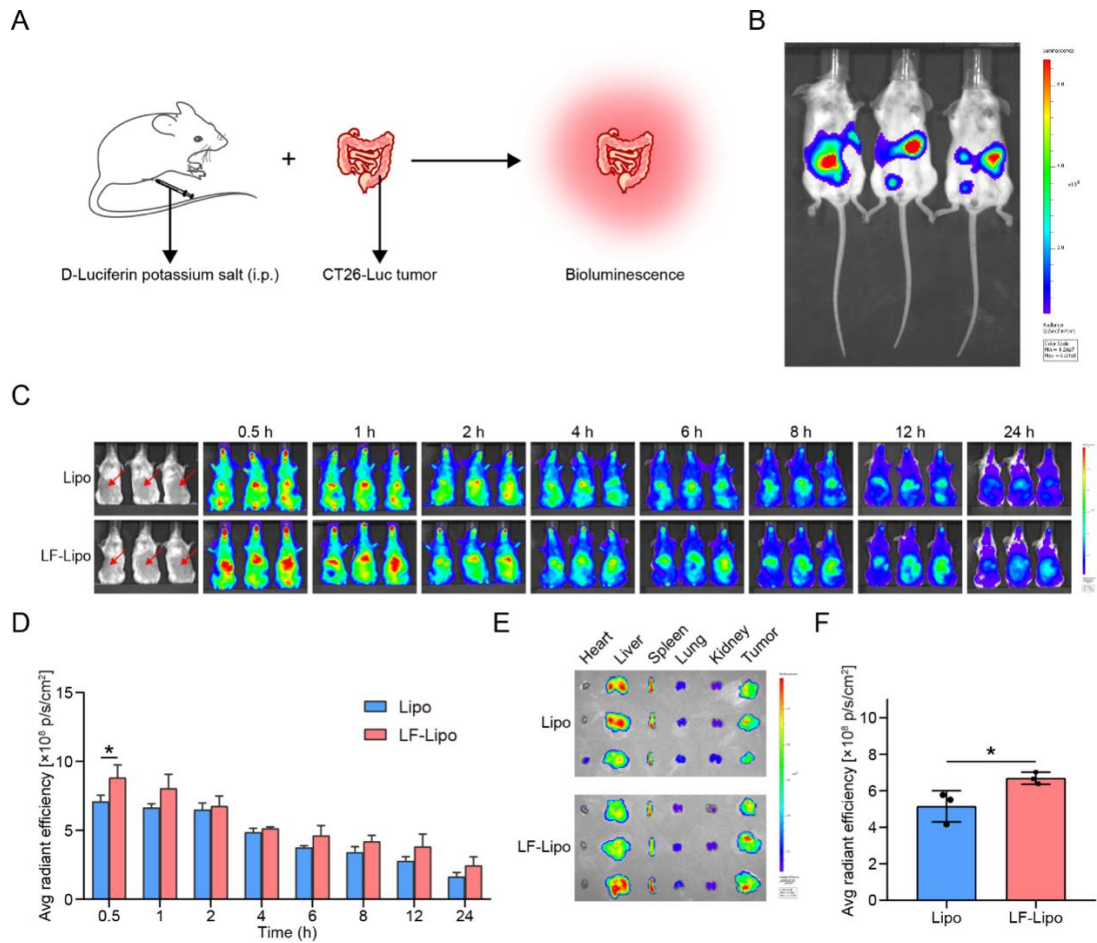



**Figure S7** Immunohistochemical staining (brown color) of BRD4, HDAC2, Gr-1, and CD206 in CT26 peritoneal tumors after treatment (scale bar=100  $\mu$ m).

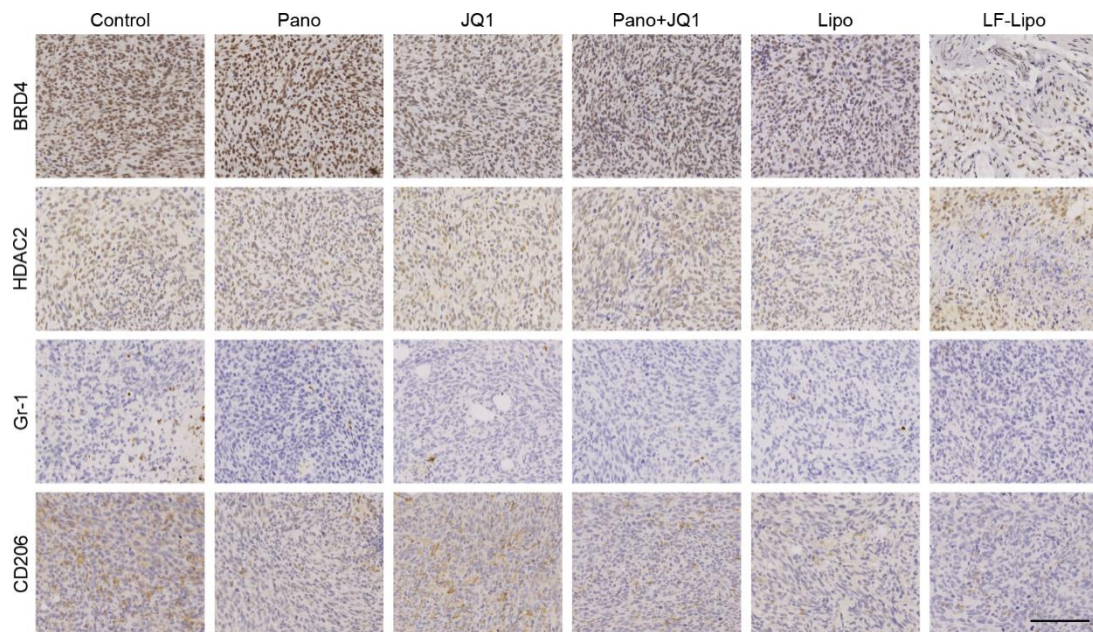

**Figure S8** Immune cell assay in the CT26 peritoneal tumor model. The percentage of F4/80<sup>+</sup> TGF- $\beta$ <sup>+</sup> (A), CD8<sup>+</sup> granzyme B<sup>+</sup> (B), and CD8<sup>+</sup> IFN- $\gamma$ <sup>+</sup> (C) cells in the tumor tissues.

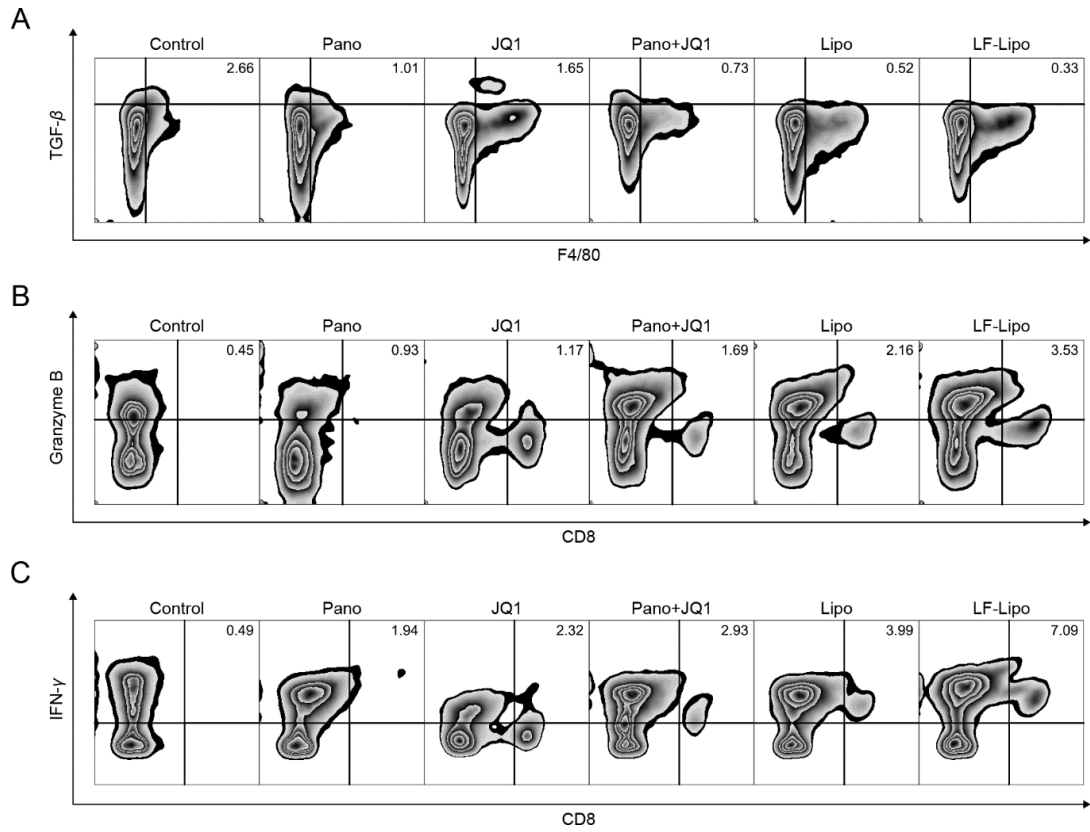

Supplement: mmc1.pdf [file mmc1.pdf]
